# Supplementary material for: Effect of Fetal Bovine Serum or Basic Fibroblast Growth Factor on Cell Survival and the Proliferation of Neural Stem Cells: The Influence of Homocysteine Treatment
Source: MDPI journal article supplement (doi:10.3390/ijms241814161), 2023-09-15

Full blots with Stain free and  $\beta$ -  
Actin loading controls

# TUBB3 Day 3

TUBB3

Stain Free Blot

Blot Restained  
for  $\beta$ -actin

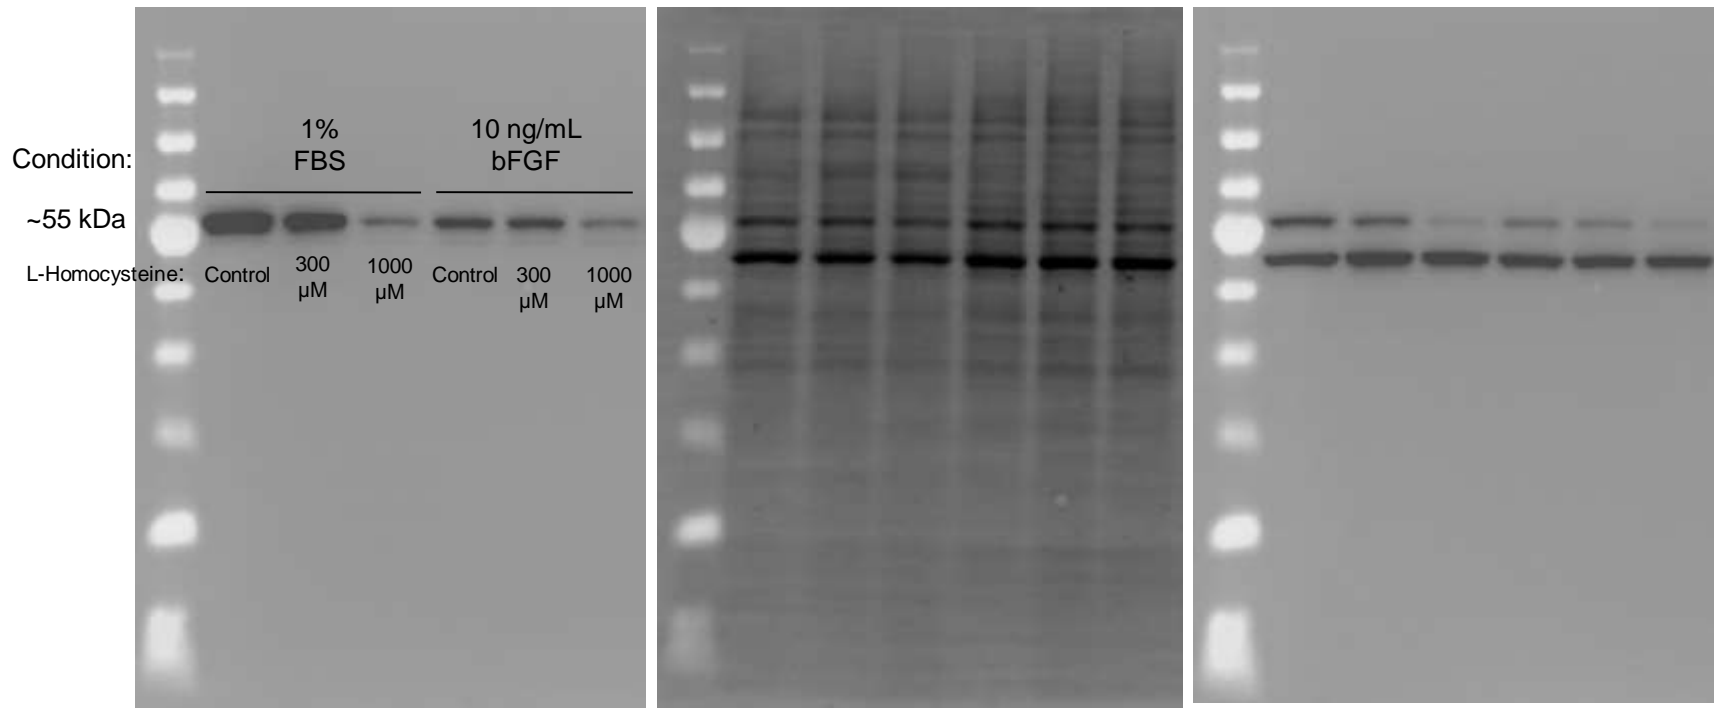

# TUBB3 Day 7

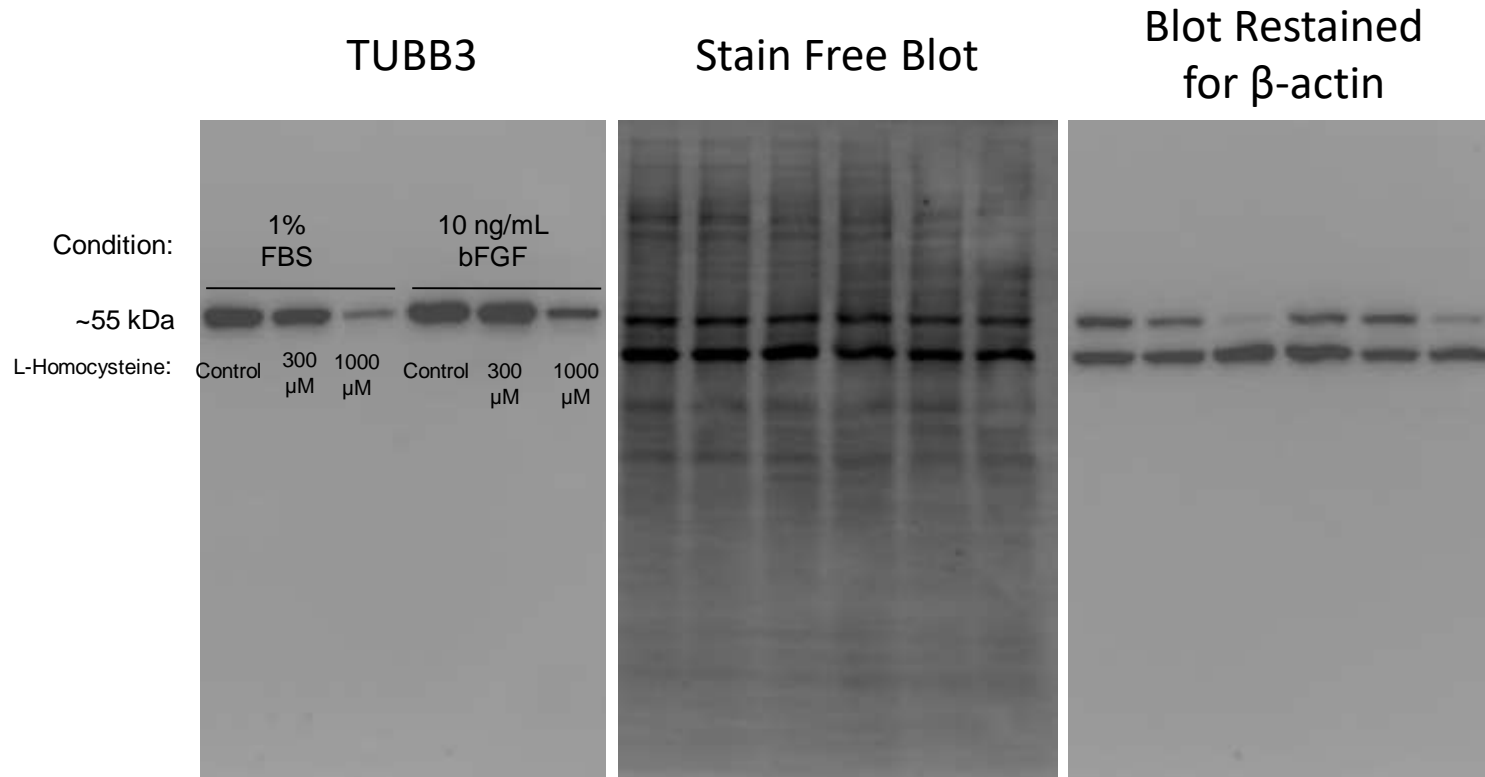

# GFAP Day 3

GFAP

Stain Free Blot

Blot Prestained for  
 $\beta$ -actin

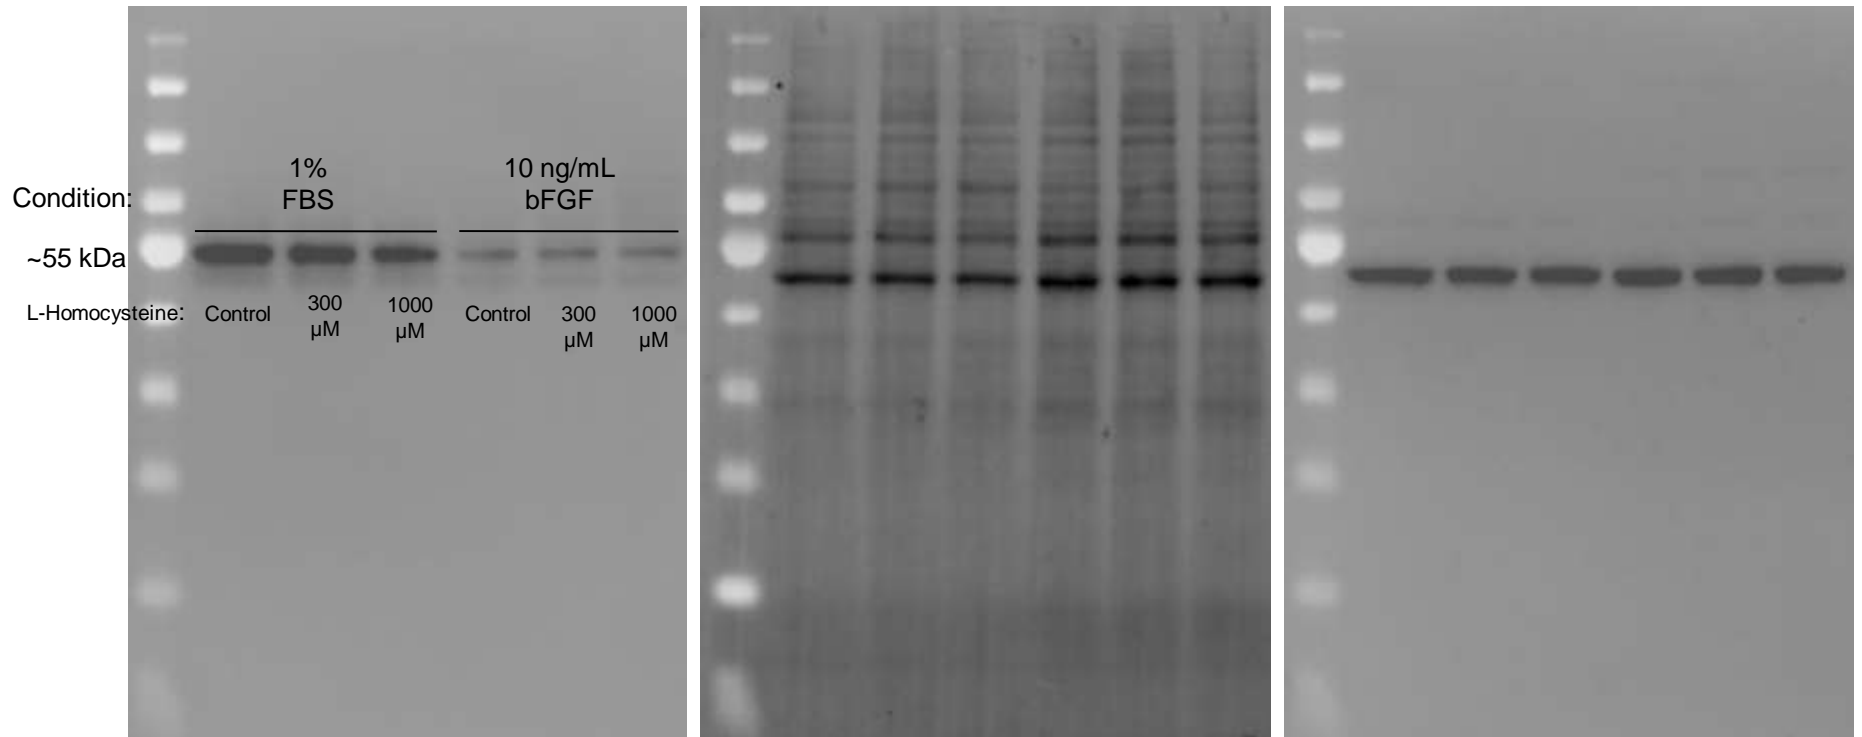

# GFAP Day 7

GFAP

Stain Free Blot

Blot Prestained for  
 $\beta$ -actin

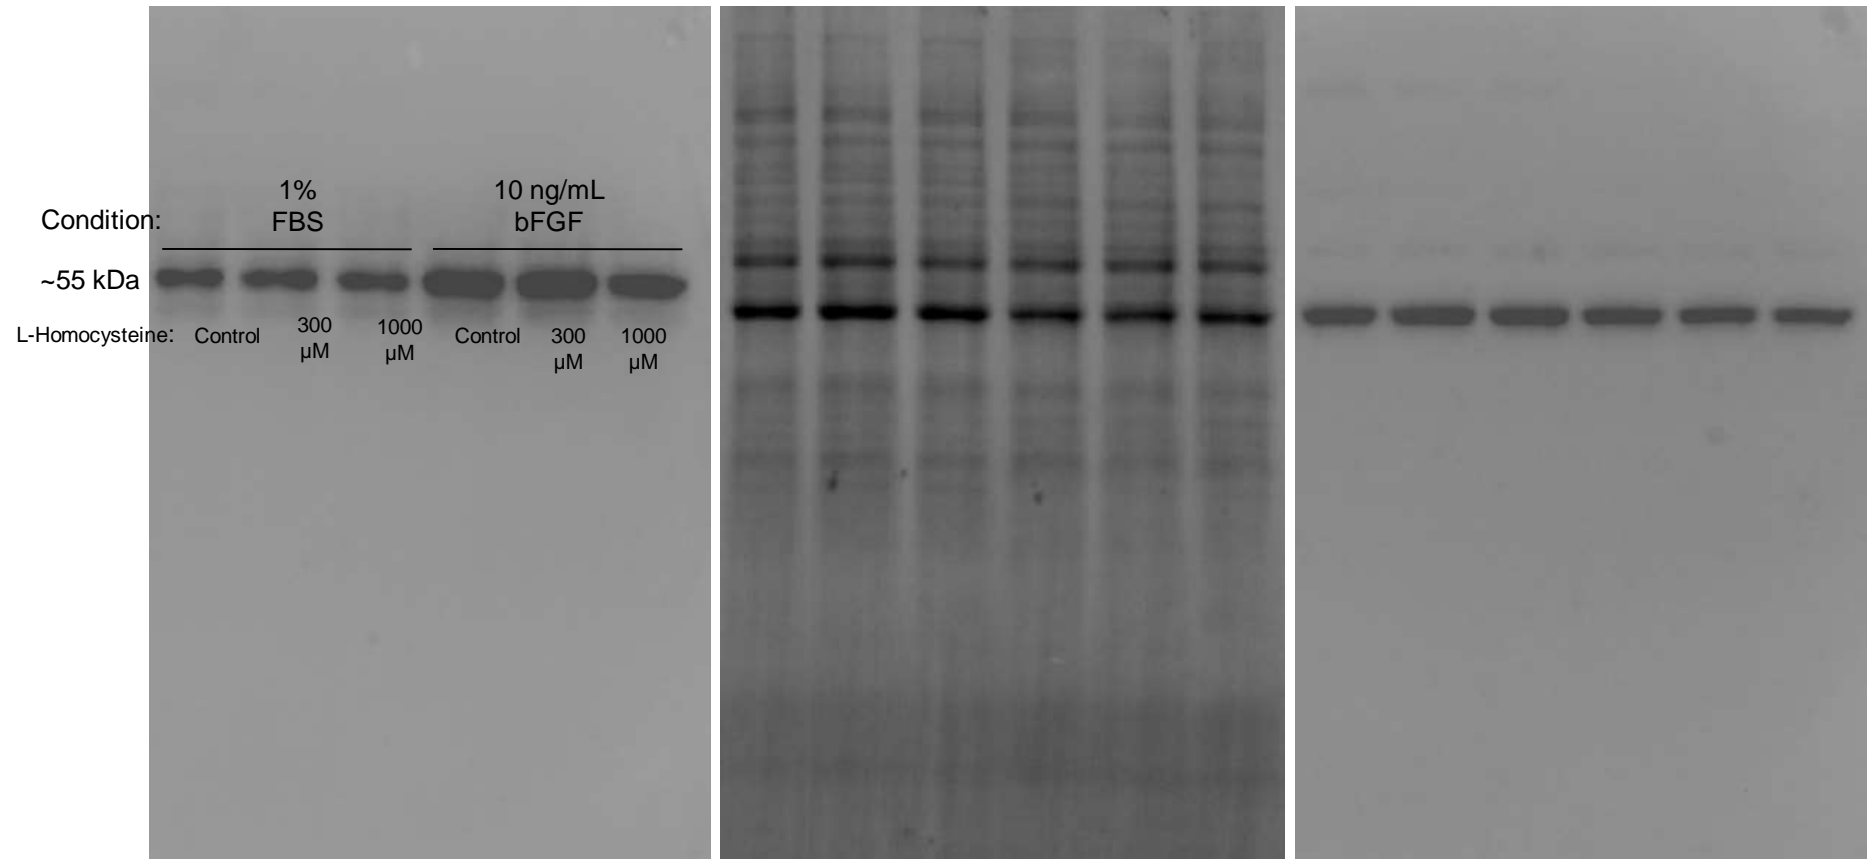

# SOX2 Day 3

SOX2

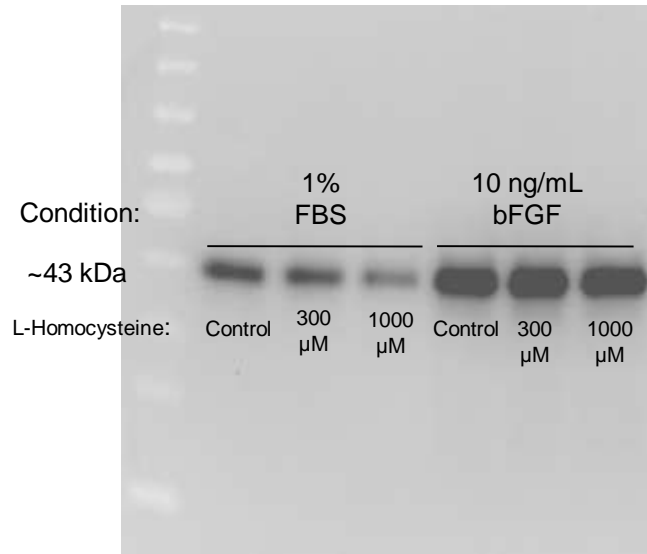

Stain Free Blot

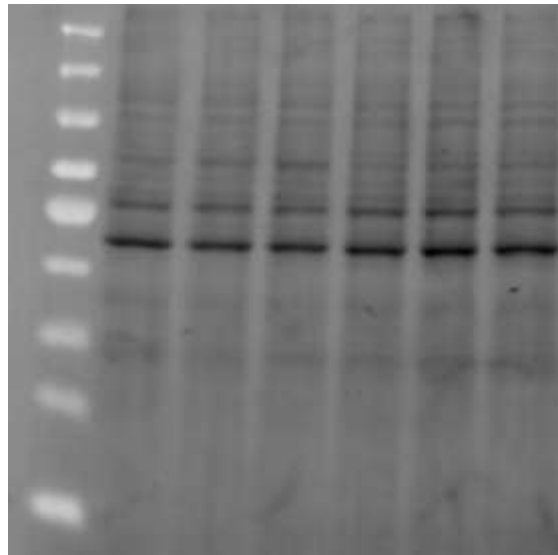

Blot Restained for  $\beta$ -actin

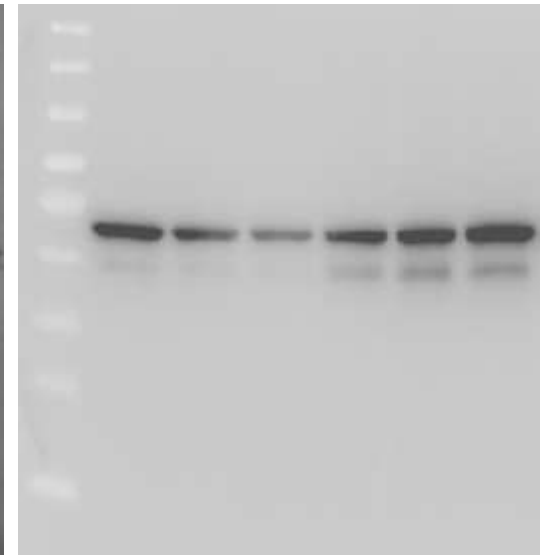

# SOX2 Day 7

SOX2

Stain Free Blot

Blot Restained  
for  $\beta$ -actin

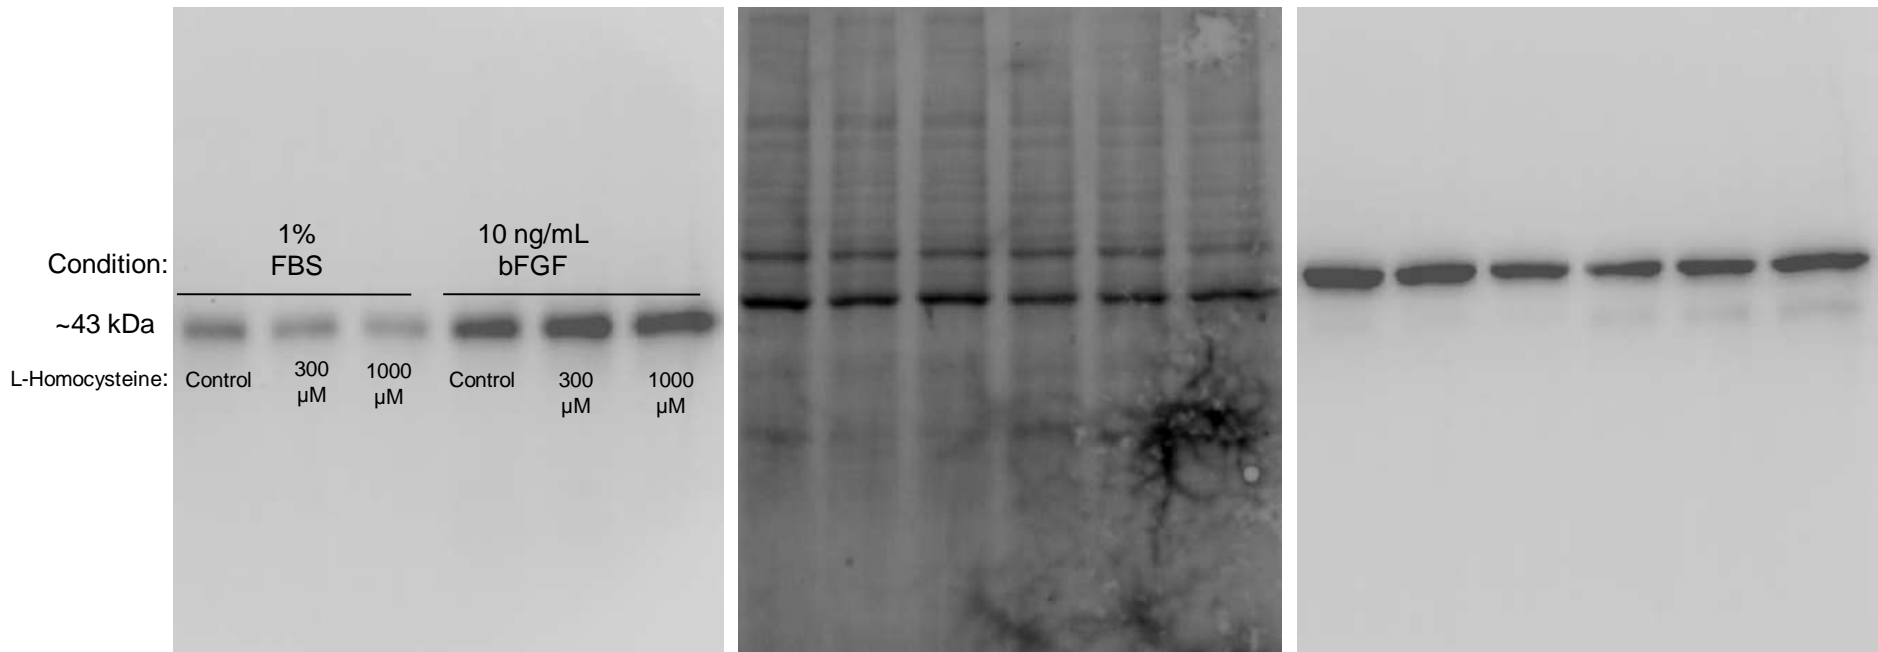

Supplement: s1 [file s1]
